# Supplementary material for: Nursing Students' Skills of Monitoring, Measuring, Reporting and Attitudes towards Vital Signs in the Clinical Practice Process: An Observational Evaluation
Source: Research Square preprint supplement (doi:10.21203/rs.3.rs-6502579/v1), 2025-07-11
Supplement: Supplementary file 1 [file d19f19e4b32154e9753854e2.docx]

**Vital Signs Measurement Skill Assessment Observation Form**

**STUDENT NAME/NO:**

| **Implementation Steps** | **Correct** | **Incorrect/incomplete** | **Not implemented** |
| --- | --- | --- | --- |
| **Measuring Body Temperature** |  |  |  |
| Performing hand hygiene |  |  |  |
| Identifying patient |  |  |  |
| Evaluating the area where the temperature will be measured |  |  |  |
| Positioning the measuring device in the appropriate area/keeping it at the appropriate distance |  |  |  |
| Applying the process |  |  |  |
| Ensuring hand hygiene |  |  |  |
| Saving the transaction |  |  |  |
| **Blood Pressure Measurement** |  |  |  |
| Performing hand hygiene |  |  |  |
| Identifying patient |  |  |  |
| Selection of an appropriate area |  |  |  |
| Positioning the patient's arm/leg in the appropriate position |  |  |  |
| Palpating the brachial or popliteal artery; positioning the cuff 25 cm above the pulse |  |  |  |
| Placement of the stethoscope receiver over the brachial or popliteal artery and the earphones in the ears |  |  |  |
| Closing valve of pressure bulb; rapidly inflates cuff to 30 mmHg above systolic pressure |  |  |  |
| Releasing pressure bulb slowly at a rate of 2-3 mmHg/second; noting value on manometer when first sound heard |  |  |  |
| Deflating cuff gently and noting the point at which dampened/muffled sound disappears |  |  |  |
| Removing cuff from extremity |  |  |  |
| Proper cleaning of equipment |  |  |  |
| Ensuring hand hygiene |  |  |  |
| Saving the transaction |  |  |  |
| **Evaluation of the Pulse from the Radial Artery** |  |  |  |
| Perform hand hygiene |  |  |  |
| Identify patient |  |  |  |
| Selection of an appropriate area |  |  |  |
| Appropriate positioning of the patient's arm |  |  |  |
| Placing tips of first two fingers over groove along radial or thumb side of patients’ inner wrist |  |  |  |
| Compressing against radius to obliterate pulse, then slightly releasing to palpate pulse |  |  |  |
| Counting 30 seconds if the pulse is rhythmic and 60 seconds if abnormal |  |  |  |
| Saving the transaction |  |  |  |
| **Evaluation of Respiration** |  |  |  |
| Monitoring the rib cage without telling the patient |  |  |  |
| Counting 30 seconds if breathing is rhythmic and 60 seconds if breathing is abnormal |  |  |  |
| Saving the transaction |  |  |  |
| **Evaluation of oxygen saturation (SpO2)** |  |  |  |
| Selection of an appropriate area |  |  |  |
| Correctly placing the tool on the skin |  |  |  |
| Implementing the process |  |  |  |
| Proper cleaning of equipment |  |  |  |
| Ensuring hand hygiene |  |  |  |
| Saving saturation |  |  |  |
